# Supplementary material for: Antimicrobial Resistance Mechanisms and Virulence of Colistin- and Carbapenem-Resistant Acinetobacter baumannii Isolated from a Teaching Hospital in Taiwan
Source: MDPI journal article supplement (doi:10.3390/microorganisms9061295), 2021-06-14
Supplement: s1 [file s1]

**Table S1. Oligonucleotide sequences used in this study.**

| Primer                                            | Primer sequence (5' to 3')  | Reference |
|---------------------------------------------------|-----------------------------|-----------|
| Species identification                            |                             |           |
| D14                                               | GACAACAGTTATAAGGTTTCAGGTG   |           |
| D19                                               | CCGCTATCTGTATCCGCAGTA       |           |
| D16                                               | GATAACAGCTATAAAGTTTCAGGTGGT |           |
| D8                                                | CAAAAACGTACAGTTGTACCACTGC   | [1]       |
| Sp2F                                              | GTCCTGATCCGAAATTCTCG        |           |
| Sp4F                                              | CACGCCGTAAGAGTGCATTA        |           |
| Sp4R                                              | AACGGAGCTTGTCAGGGTTA        |           |
| Oxacillinase genes                                |                             |           |
| bla <sub>OXA-51</sub> -F                          | TAATGCTTTGATCGGCCTTG        |           |
| bla <sub>OXA-51</sub> -R                          | TGGATTGCACTTCATCTTGG        |           |
| bla <sub>OXA-58</sub> -F                          | AAGTATTGGGGCTTGTGCTG        |           |
| bla <sub>OXA-58</sub> -R                          | CCCCTCTGCGCTCTACATAC        | [2]       |
| bla <sub>OXA-23</sub> -F                          | GATCGGATTGGAGAACCAGA        |           |
| bla <sub>OXA-23</sub> -R                          | ATTTCTGACCGCATTTCCAT        |           |
| bla <sub>OXA-24</sub> -F                          | GGTTAGTTGGCCCCCTTAAA        |           |
| bla <sub>OXA-24</sub> -R                          | AGTTGAGCGAAAAGGGGATT        |           |
| <i>pmrCAB</i> amplification for Sanger sequencing |                             |           |
| pmrC-F                                            | CGGTAAGCGTGATACCTTTGA       |           |
| pmrC-IF                                           | CCGTGGTCGGTGTTTACTT         |           |
| pmrC-R                                            | GAGCCAAACCATCTAAACCGT       |           |
| pmrA-F                                            | ACTGGACATGTTGCACTCTT        |           |
| pmrA-R                                            | TGAAGTGCAACCTTATAAGCAC      | [3]       |
| pmrB-F                                            | ATTCGAACCATCCGAGGACT        |           |
| pmrB-R                                            | TGCGAGGAGCACATTTTCTA        |           |
| lpxA-F                                            | TGAAGCATTAGCTCAAGTTT        |           |
| lpxA-R                                            | GTCAGCAAATCAATACAAGA        |           |
| lpxD-F                                            | CAAAGTATGAATACAACCTTTGAG    |           |
| lpxD-R                                            | TTGAGCTAATGCTTCAACAA        |           |
| lpxC-F                                            | TGAAGATGATGTTCTGCAA         | [4]       |
| lpxC-R                                            | TGGTGAAAATCAGGCAATGAA       |           |
| <i>eptA</i> gene amplification                    |                             |           |
| eptA1-F                                           | CTCAAGGAGCCATCGTCATAT       |           |
| eptA1-R                                           | GGGTTACGACTGCCCTCTTA        | [5]       |
| eptA2-F                                           | AGTTTTACTAGCTAAGATTTCGAG    |           |

| Primer                         | Primer sequence (5' to 3') | Reference  |
|--------------------------------|----------------------------|------------|
| <i>eptA</i> gene amplification |                            |            |
| eptA2-R                        | TGATGCATAGCTGACGAAG        | [5]        |
| Prom eptA-F                    | CAGGAAGTTCCTTTATCTGG       | This study |
| Prom eptA-R                    | CTAGCCAGATAGATAAA          |            |
| Primers for qRT-PCR            |                            |            |
| rpoB-QF                        | ATGCCGCCTGAAAAAGTAAC       | [3]        |
| rpoB-QR                        | TCCGCACGTAAAGTAGGAAC       |            |
| pmrC-QF                        | TGGAAATGGACTGCCAAAAT       |            |
| pmrC-QR                        | ACTTCCGAAACATCGGTCTG       |            |
| eptA-QF                        | TGCTTTTATCTATCTGGCTAGGTT   | [5]        |
| eptA-QR                        | TGTCGCCCCTAAGAAAAGAACT     |            |
| naxD-QF                        | ACCGATCAATACCCCTCATT       | [6]        |
| naxD-QR                        | GTTCGCCATAATTGGTCAGT       |            |

**Table S2. Generation time of colistin- and carbapenem-resistant *Acinetobacter baumannii* isolates.**

| Isolate    | Generation time (min) |
|------------|-----------------------|
| T1060317   | 27.65 ± 1.31          |
| T1060361   | 24.65 ± 1.38          |
| T1060578   | 25.49 ± 0.93          |
| T1060580   | 26.62 ± 0.83          |
| T1070171   | 25.76 ± 1.13          |
| T1070213   | 25.03 ± 0.91          |
| T1070678   | 26.48 ± 2.10          |
| ATCC 19606 | 26.83 ± 1.42          |

## References

1. Higgins, P.G.; Lehmann, M.; Wisplinghoff, H.; Seifert, H. gyrB multiplex PCR to differentiate between *Acinetobacter calcoaceticus* and *Acinetobacter* genomic species 3. *J Clin Microbiol* **2010**, *48*, 4592-4594, doi:10.1128/JCM.01765-10.
2. Woodford, N.; Ellington, M.J.; Coelho, J.M.; Turton, J.F.; Ward, M.E.; Brown, S.; Amyes, S.G.; Livermore, D.M. Multiplex PCR for genes encoding prevalent OXA carbapenemases in *Acinetobacter* spp. *Int J Antimicrob Agents* **2006**, *27*, 351-353, doi:10.1016/j.ijantimicag.2006.01.004.
3. Lee, J.Y.; Chung, E.S.; Ko, K.S. Transition of colistin dependence into colistin resistance in *Acinetobacter baumannii*. *Sci Rep* **2017**, *7*, 14216, doi:10.1038/s41598-017-14609-0.
4. Moffatt, J.H.; Harper, M.; Harrison, P.; Hale, J.D.; Vinogradov, E.; Seemann, T.; Henry, R.; Crane, B.; St Michael, F.; Cox, A.D., et al. Colistin resistance in *Acinetobacter baumannii* is mediated by complete loss of lipopolysaccharide production. *Antimicrob Agents Chemother* **2010**, *54*, 4971-4977, doi:10.1128/aac.00834-10.
5. Trebosc, V.; Gartenmann, S.; Totzl, M.; Lucchini, V.; Schellhorn, B.; Pieren, M.; Lociuro, S.; Gitzinger, M.; Tigges, M.; Bumann, D., et al. Dissecting colistin resistance mechanisms in extensively drug-resistant *Acinetobacter baumannii* clinical isolates. *mBio* **2019**, *10*, doi:10.1128/mBio.01083-19.
6. Chin, C.Y.; Gregg, K.A.; Napier, B.A.; Ernst, R.K.; Weiss, D.S. A PmrB-regulated deacetylase required for lipid A modification and polymyxin resistance in *Acinetobacter baumannii*. *Antimicrob Agents Chemother* **2015**, *59*, 7911-7914, doi:10.1128/aac.00515-15.
